# Supplementary material for: Population genomics of grey wolves and wolf-like canids in North America
Source: PubMed Central journal article supplement (PMC6231604; doi:10.1371/journal.pgen.1007745), 2018-11-12
Supplement: pgen.1007745.s014.pdf [file pgen.1007745.s014.pdf]

Table S1.

| Sample              | Name                | Opgraph clusters                          | Coverage x | Catalogue name                                                                         | dd_mm_yyyy | Location   | Location     | Note on location                                                                    | Provider                                                                             | Total number of usable reads | Estimated error rates (%) | Heterozygosity estimates | Inbreeding coefficients | Number of segments | Mean length ROH | Median length ROH | Max length ROH | Total length ROH |
|---------------------|---------------------|-------------------------------------------|------------|----------------------------------------------------------------------------------------|------------|------------|--------------|-------------------------------------------------------------------------------------|--------------------------------------------------------------------------------------|------------------------------|---------------------------|--------------------------|-------------------------|--------------------|-----------------|-------------------|----------------|------------------|
| Golden jackal       | Golden jackal       | Golden jackal                             | 4.40       | RKW 1332_SAMN03366713                                                                  |            |            |              |                                                                                     | Freedman et al. 2014                                                                 | 107048490                    | NA                        | 0.00118                  |                         |                    |                 |                   |                |                  |
| Red wolf            | Red wolf 3          | Red Wolf                                  | 5.57       | #652-M PDZA (SAMN10246099)                                                             | 01_06_2004 | 29.9399086 | -94.653957   | "Rough location for capture zone of founders", (from Point Defiance Zoo & Aquarium) | U.S. Fish and Wildlife Service                                                       | 149530167                    | 0.0756                    | 0.00168                  | 0.108                   |                    |                 |                   |                |                  |
| Red wolf            | Red wolf 2          | Red Wolf                                  | 5.24       | BioSample: SAMN02921318; Sample name: rwb; SRA: SRS661494                              |            | 29.9399086 | -94.653957   | "Rough location for capture zone of founders"                                       | vonHoldt et al. 2016                                                                 | 182476507                    | 0.5853 (*)                | 0.00500                  |                         |                    |                 |                   |                |                  |
| Red wolf            | Red wolf 1          | Red Wolf                                  | 25.41      | BioSample: SAMN02921317; Sample name: rwa; SRA: SRS661493                              |            | 29.9399086 | -94.653957   | "Rough location for capture zone of founders"                                       | vonHoldt et al. 2016                                                                 | 730585462                    | 0.0403                    | 0.00178                  | 0.191                   |                    |                 |                   |                |                  |
| Coyote              | Florida             | Coyote                                    | 6.96       | BioSample: SAMN05439957; Sample name: FloridaCoyote; SRA: SRS1589014                   |            | 30.1738346 | -82.238964   | "Estimated from vonHoldt et al. 2016"                                               | vonHoldt et al. 2016                                                                 | 192248702                    | 0.0395                    | 0.00179                  | 0.024                   |                    |                 |                   |                |                  |
| Coyote              | Illinois            | Coyote                                    | 6.17       | BioSample: SAMN02921303; Sample name: mvc; SRA: SRS661479                              |            | 41.656687  | -88.094688   | "Estimated from vonHoldt et al. 2016"                                               | vonHoldt et al. 2016                                                                 | 192453098                    | 0.4814 (*)                | 0.00500                  | 0.000                   |                    |                 |                   |                |                  |
| Coyote              | Missouri            | Coyote                                    | 4.79       | MSB-Mamm:58790 (SAMN10180423)                                                          | 77_77_1987 | 37.186564  | -93.603057   | 10 MI. W. SPRINGFIELD ON HWY 44                                                     | University of New Mexico Museum of Southwestern Biology (Gopalakrishnan et al. 2018) | 120687507                    | 0.0433                    | 0.00155                  | 0.020                   |                    |                 |                   |                |                  |
| Coyote              | Quebec              | Coyote                                    | 3.27       | BioSample: SAMN05736724; Sample name: QuebecWolf; SRA: SRS1677740                      |            | 47.5618756 | -75.394498   | "Estimated from vonHoldt et al. 2016"                                               | vonHoldt et al. 2016                                                                 | 103090908                    | 0.1931 (*)                | 0.00334                  | 0.015                   |                    |                 |                   |                |                  |
| Coyote              | Alaska              | Coyote                                    | 7.84       | UAM-Mamm:19791 (SAMN10180421)                                                          | 04_03_1991 | 67.7333333 | -152.416667  | Confluence of John River and Hunt Fork                                              | University of Alaska Museum of the North (Gopalakrishnan et al. 2018)                | 202147010                    | 0.0473                    | 0.00154                  | 0.171                   |                    |                 |                   |                |                  |
| Coyote              | Mexico              | Coyote                                    | 11.33      | MSB-Mamm:83943 (SAMN10180422)                                                          | 13_10_1996 | 28.9954    | -112.38596   | Isla Tiburón                                                                        | University of New Mexico Museum of Southwestern Biology (Gopalakrishnan et al. 2018) | 286356442                    | 0.0420                    | 0.00160                  | 0.199                   |                    |                 |                   |                |                  |
| Coyote              | California          | Coyote                                    | 26.64      | BioSample: SAMN02921301; Sample name: cac; SRA: SRS661477                              |            | 37.4486362 | -120.581619  | "Estimated from vonHoldt et al. 2016"                                               | vonHoldt et al. 2016                                                                 | 811742421                    | 0.0780                    | 0.00191                  | 0.146                   |                    |                 |                   |                |                  |
| Coyote              | Alabama             | Coyote                                    | 5.06       | BioSample: SAMN02921302; Sample name: alc; SRA: SRS661478                              |            | 32.8918405 | -86.081453   | "Estimated from vonHoldt et al. 2016"                                               | vonHoldt et al. 2016                                                                 | 167870483                    | 0.4491 (*)                | 0.00500                  |                         |                    |                 |                   |                |                  |
| Eastern timber wolf | Algonquin 3         | Eastern Timber Wolf                       | 5.20       | Z50514 (SAMN10246098)                                                                  | 03_02_2010 | 45.34459   | -78.94058    | Algonquin National Park                                                             | Ontario Ministry of Natural Resources                                                | 144748744                    | 0.0405                    | 0.00163                  | 0.192                   |                    |                 |                   |                |                  |
| Eastern timber wolf | Algonquin 2         | Eastern Timber Wolf                       | 4.21       | BioSample: SAMN05791669; Sample name: AlgonquinWolf13467; SRA: SRS1704985              |            | 45.8371591 | -78.3813126  | Algonquin National Park                                                             | vonHoldt et al. 2016                                                                 | 112047899                    | 0.0610                    | 0.00166                  | 0.097                   |                    |                 |                   |                |                  |
| Eastern timber wolf | Algonquin 1         | Eastern Timber Wolf                       | 6.18       | BioSample: SAMN05791668; Sample name: AlgonquinWolf13470; SRA: SRS1704945              |            | 45.8371591 | -78.3813126  | Algonquin National Park                                                             | vonHoldt et al. 2016                                                                 | 122850385                    | 0.0455                    | 0.00231                  | 0.000                   |                    |                 |                   |                |                  |
| Great lakes wolf    | IRNP                | Great Lakes Wolf                          | 9.04       | BioSample: SAMN04209256; Sample name: RKW1387; SRA: SRS1136754                         |            | 47.9958654 | -88.9092899  | Isle Royale National Park                                                           | vonHoldt et al. 2016, Marsden et al. 2016                                            | 383060298                    | 0.0681                    | 0.00110                  | 0.400                   | 297                | 1730698         | 1468456           | 5353278        | 514017249        |
| Great lakes wolf    | Minnesota           | Great Lakes Wolf                          | 23.82      | BioSample: SAMN02921310; Sample name: ghw; SRA: SRS661486                              |            | 46.745947  | -94.505756   | "Estimated from vonHoldt et al. 2016"                                               | vonHoldt et al. 2016, Marsden et al. 2016                                            | 82935849                     | 0.0391                    | 0.00182                  | 0.122                   |                    |                 |                   |                |                  |
| Wolf                | Eurasia 2           | Eurasian Wolf                             | 7.72       | GW2_SAMN01974487                                                                       |            | 65.6873915 | 156.7958972  | Chukotka, Russia                                                                    | Wang et al. 2013                                                                     | 211117215                    | 0.0836                    | 0.00138                  | 0.185                   |                    |                 |                   |                |                  |
| Wolf                | Eurasia 1           | Eurasian Wolf                             | 9.56       | GW1_SAMN01974486                                                                       |            | 50.7793339 | 82.4104216   | Altai, Russia                                                                       | Wang et al. 2013                                                                     | 292402755                    | 0.1087                    | 0.00159                  | 0.129                   |                    |                 |                   |                |                  |
| Wolf                | Eurasia 3           | Eurasian Wolf                             | 9.83       | GW3_SAMN01974488                                                                       |            | 53.2799469 | 34.2068799   | Bryansk, Russia                                                                     | Wang et al. 2013                                                                     | 329090300                    | 0.1460                    | 0.00148                  | 0.166                   |                    |                 |                   |                |                  |
| Wolf                | Mexico 1            | Mexican Wolf                              | 22.15      | "BioSample: SAMN02921314; SAMN02921315; Sample name: mxa+mb; SRA: SRS661490-SRS661491" |            | 34.2923957 | -106.7932892 | "Estimated from vonHoldt et al. 2016"                                               | Fan et al. 2015                                                                      | 618720272                    | 0.0976                    | 0.00062                  | 0.714                   | 434                | 1671394         | 1446006           | 6784185        | 725385081        |
| Wolf                | Mexico 2            | Mexican Wolf                              | 2.08       | MSB-Mamm:259087 (SAMN10180511)                                                         | 02_06_2007 | 34.2923957 | -106.7932892 | Sevilleta National Wildlife Refuge                                                  | University of New Mexico Museum of Southwestern Biology (Gopalakrishnan et al. 2018) | 56091351                     | 0.0396                    | 0.00112                  | 0.370                   |                    |                 |                   |                |                  |
| Wolf                | St. Lawrence Island |                                           | 11.82      | UAM-Mamm:30678 (SAMN10246094)                                                          | 26_04_1994 | 63.7797222 | -171.7411111 | St. Lawrence Island                                                                 | University of Alaska Museum of the North                                             | 303885641                    | 0.0415                    | 0.00104                  | 0.373                   |                    |                 |                   |                |                  |
| Wolf                | Pacific Coast       |                                           | 13.56      | UAM-Mamm:21440 (SAMN10246091)                                                          | 20_03_1992 | 56.75      | -133.5       | Alexander Archipelago                                                               | University of Alaska Museum of the North                                             | 345355315                    | 0.0413                    | 0.00128                  | 0.220                   | 105                | 1495222         | 1394477           | 2969331        | 156998277        |
| Wolf                | Yellowstone 2       | Yellowstone Wolf                          | 24.25      | BioSample: SAMN02921320; Sample name: ysp; SRA: SRS661496                              |            | 44.427963  | -110.588455  | Yellowstone National Park                                                           | Fan et al. 2015                                                                      | 680714876                    | 0.0444                    | 0.00500                  | 0.166                   |                    |                 |                   |                |                  |
| Wolf                | Yellowstone 1       | Yellowstone Wolf                          | 3.66       | BioSample: SAMN02921322; Sample name: ysc; SRA: SRS661498                              |            | 44.427963  | -110.588455  | Yellowstone National Park                                                           | Fan et al. 2015                                                                      | 189644388                    | 0.6364 (*)                | 0.00149                  | 0.049                   |                    |                 |                   |                |                  |
| Wolf                | Toronto             | Atlantic, Alaskan, Central and Polar Wolf | 8.24       | 2_PAM_720 (SAMN10246095)                                                               | 77_77_2003 | 43.72      | -79.55       | Rexdale (P)                                                                         | North American Fur Auctions                                                          | 222358489                    | 0.0549                    | 0.00151                  | 0.058                   |                    |                 |                   |                |                  |
| Wolf                | Atlantic Coast      | Atlantic, Alaskan, Central and Polar Wolf | 8.19       | BAF-117 (SAMN10246096)                                                                 | 77_77_2002 | 54.9       | -59.78       | Postville                                                                           | North American Fur Auctions                                                          | 222690959                    | 0.0611                    | 0.00148                  | 0.082                   |                    |                 |                   |                |                  |
| Wolf                | Alaska 1            | Atlantic, Alaskan, Central and Polar Wolf | 6.26       | ARF07 (SAMN10246095)                                                                   | 01_09_2002 | 67         | -158         | Kobuk River                                                                         | North American Fur Auctions                                                          | 161650685                    | 0.0495                    | 0.00140                  | 0.039                   |                    |                 |                   |                |                  |
| Wolf                | Alaska 2            | Atlantic, Alaskan, Central and Polar Wolf | 6.24       | BioSample: SAMN05439956; Sample name: AlaskanWolf; SRA: SRS1589013                     |            | 63.500043  | -146.275791  | "Estimated from vonHoldt et al. 2016"                                               | vonHoldt et al. 2016                                                                 | 170693586                    | 0.0406                    | 0.00132                  | 0.015                   |                    |                 |                   |                |                  |
| Wolf                | Saskatchewan        | Atlantic, Alaskan, Central and Polar Wolf | 4.63       | GWC-857 (SAMN10246093)                                                                 | 77_77_2002 | 55.1       | -105.28      | La Ronge                                                                            | North American Fur Auctions                                                          | 134908797                    | 0.0640                    | 0.00156                  | 0.005                   |                    |                 |                   |                |                  |
| Wolf                | Qamarijuaq          | Atlantic, Alaskan, Central and Polar Wolf | 3.82       | R1P9 (SAMN10246092)                                                                    | 01_04_2000 | 64.43      | -93.1        | Tebery Lake                                                                         | Department of Environment Nunavut                                                    | 100312929                    | 0.0463                    | 0.00115                  | 0.027                   |                    |                 |                   |                |                  |
| Wolf                | South Baffin        | Polar, West and East Arctic Wolf          | 12.72      | PG65 (SAMN10246088)                                                                    | 05_02_2000 | 65.17      | -65.5        | Mouth of Chidliak Fiord/Cumberland Sound                                            | Department of Environment Nunavut                                                    | 335568758                    | 0.0434                    | 0.00114                  | 0.267                   |                    |                 |                   |                |                  |
| Wolf                | North Baffin        | Polar, West and East Arctic Wolf          | 14.13      | PIE8 (SAMN10246087)                                                                    | 14_12_1999 | 72.7       | -77.98       | "Graveyard"                                                                         | Department of Environment Nunavut                                                    | 363205435                    | 0.0402                    | 0.00142                  | 0.090                   | 60                 | 1382523         | 1255827           | 2684601        | 82951367         |
| Wolf                | Victoria Island     | Polar, West and East Arctic Wolf          | 11.77      | HW70 (SAMN10246096)                                                                    | 25_01_2004 | 72.77      | -111.02      | Wynnatt Bay                                                                         | Environment and Natural Resources Northwest Territories                              | 307779135                    | 0.0393                    | 0.00146                  | 0.044                   |                    |                 |                   |                |                  |
| Wolf                | Banks Island        | Polar, West and East Arctic Wolf          | 15.36      | SW24 (SAMN10246089)                                                                    | 20_04_2004 | 74.13      | -119.75      | Thomson River                                                                       | Environment and Natural Resources Northwest Territories                              | 400130823                    | 0.0390                    | 0.00137                  | 0.140                   | 91                 | 1526788         | 1397649           | 3131701        | 138937171        |
| Wolf                | Krummelangsa        |                                           | 0.44       | M10575 (SAMN10246097)                                                                  | 77_77_1995 | 74.08333   | -23.83333    | Krummelangsa                                                                        | Natural History Museum of Denmark                                                    | 159952327                    | 0.1461 (*)                | 0.00500                  | 0.041                   |                    |                 |                   |                |                  |
| Wolf                | Ellesmere 2         | Polar, West and East Arctic Wolf          | 5.95       | GF217 (SAMN10246090)                                                                   | 06_04_2002 | 76.42      | -82.88       | In community of Grise Fiord                                                         | Department of Environment Nunavut                                                    | 153517018                    | 0.0399                    | 0.00125                  | 0.036                   |                    |                 |                   |                |                  |
| Wolf                | Daneborg            | Atlantic, Alaskan, Central and Polar Wolf | 11.21      | Daneborg (SAMN10180430)                                                                | 13_01_2013 | 74.3       | -20.2334697  | Daneborg                                                                            | Greenland Institute of Natural Resources (Gopalakrishnan et al. 2018)                | 284695953                    | NA                        | 0.00102                  | 0.313                   | 202                | 1592261         | 1393555           | 4023046        | 321636675        |
| Wolf                | Ellesmere 1         | Polar, West and East Arctic Wolf          | 7.69       | GF212 (SAMN10180431)                                                                   | 24_03_2002 | 77.22      | -85.42       | 10 km south of Gunnars Island                                                       | Department of Environment Nunavut (Gopalakrishnan et al. 2018)                       | 203079413                    | 0.0400                    | 0.00084                  | 0.385                   |                    |                 |                   |                |                  |

References  
 Freedman AH, et al. (2014) Genome sequencing highlights the dynamic early history of dogs. *PLoS Genet* 10(11):e1004016.  
 vonHoldt BM, et al. (2016) Whole-genome sequence analysis shows that two endemic species of North American wolf are admixtures of the coyote and gray wolf. *Sci Adv* 2(7):e1501714.  
 Wang G-Q, et al. (2013) The genomics of selection in dogs and the parallel evolution between dogs and humans. *Nat Commun* 4:1866.  
 Fan Z, et al. (2016) Worldwide patterns of genomic variation and admixture in gray wolves. *Genome Res* 26(2):163-173.  
 Gopalakrishnan S, et al. (2018) Interspecific gene flow shaped the evolution of the genus *Canis*. *Curr Biol* (in press).  
 Marsden, CD, et al (2016) Bottlenecks and selective sweeps during domestication have increased deleterious genetic variation in dogs. *Proc Natl Acad Sci U S A* 113(1):152-157.

# We acknowledge that the location of the sample seems highly improbable, however it is information we have been given along with the sample and therefore the information we present. While it is surprising, it is the only sample from this location or any large city location, which initially was why the sample was interesting. The specific sample originated from the North American Fur Auctions and there is a Hudson's Bay Auction House, Rexdale, Ontario, Toronto. The information given together with other samples from the North American Fur Auctions, fits a specific rural location with detail on nearby named locations. The geo location with the sample fits a green area along a river going through Rexdale. Perhaps the wolf truly came from here following the river. We are unable to conclude whether the sample originates from a rare incident or mislabelling from the provider, therefore we chose to present the metadata we were given with the sample.

\* The specific samples are treated as high error rate samples.
